# Supplementary material for: Blockade of Serotonin 5-HT6 Receptor Constitutive Activity Alleviates Cognitive Deficits in a Preclinical Model of Neurofibromatosis Type 1
Source: MDPI journal article supplement (doi:10.3390/ijms221810178), 2021-09-21
Supplement: s1 [file s1]

## **Blockade of Serotonin 5-HT<sub>6</sub> Receptor Constitutive Activity Alleviates Cognitive Deficits in a Preclinical Model of Neurofibromatosis Type 1**

**Supplementary Figures, Legends and Table. Doucet E. et al. IJMS 2021**

**Supplementary Figure S1. Original Western blots used to quantify the immunoreactive bands.** Representative bands illustrated on Figure 1 are framed in red. All bands used for the quantification are outlined in green. **A.** Western blot assessing neurofibromin and actin expression in PFC of adult WT (n=3) and *Nf1*<sup>+/-</sup> mice (n=5). **B.** Western blots assessing p70S6K phosphorylation at Thr421-Ser424 and p70S6K expression in PFC of adult WT (n=3) and *Nf1*<sup>+/-</sup> mice (n=5). **C.** Western blots assessing p70S6K phosphorylation at Thr421-Ser424 and p70S6K expression in PFC of *Nf1*<sup>+/-</sup> mice injected with either vehicle (n=3) or Rapamycin (Rapa, 10 mg/kg, n=3), or SB258585 (SB, 2.5 mg/kg, n=3)

**Supplementary Figure S2. Blockade of the 5-HT<sub>6</sub> receptor-mTOR pathway does not affect sociability and short-term and long-term social discrimination in wildtype mice**

WT mice were injected with either vehicle, or SB258585 (SB, 2.5 mg/kg, i.p.), or CPPQ (2.5 mg/kg, i.p.) or rapamycin (Rapa, 10 mg/kg, i.p.) 15 min before the habituation phase. **A.** Schema illustrating the procedure used for assessing sociability of WT mice. **B.** Exploration time (expressed in %) of the object and the congener by the tested mice. \*\*\*  $p < 0.001$ , significantly different from object; two-way ANOVA followed by Bonferroni's test, with object and treatment as factors. **C.** Sociability index in each condition (vehicle: n = 15, SB: n = 12, Rapa: n = 14, CPPQ: n = 15). **D.** Schema illustrating the procedure used for assessing short-term social discrimination. **E.** Exploration time (expressed in %) of the novel and the familiar mouse by the tested mice. \*\*\*  $p < 0.001$ , significantly different from familiar mouse; two-way ANOVA followed by Bonferroni's test, with novelty and treatment as factors. **F.** Discrimination index in the corresponding conditions (vehicle: n = 16, SB: n = 13, Rapa: n =

12, CPPQ: n = 15). **G.** Schema illustrating the procedure used for assessing long-term social discrimination. **H.** Exploration time (expressed in %) of the novel and the familiar mouse by the tested mice. \*\*  $p < 0.01$ , \*\*\*  $p < 0.001$ , significantly different from familiar mouse; two-way ANOVA followed by Bonferroni's test, with novelty and treatment as factors. **I.** Discrimination index in the corresponding conditions (vehicle: n = 14, SB: n = 13, Rapa: n = 13, CPPQ: n = 17). n.s. non-significant vs. vehicle-injected WT mice, Kruskal-Wallis followed by Dunn's test.

**Supplementary Figure S3. Blockade of the 5-HT<sub>6</sub> receptor-mTOR pathway does not affect associative memory in WT mice**

WT mice were injected with either vehicle, or SB258585 (SB, 2.5 mg/kg, i.p.), CPPQ (2.5 mg/kg, i.p.) or rapamycin (Rapa, 10 mg/kg, i.p.) 30 min before the familiarization phase. **A.** Exploration time (expressed in %) of the different objects during the test phase. \*  $p < 0.05$ , \*\*\*  $p < 0.001$  significantly different from non-swapped object; two-way ANOVA followed by Bonferroni's test, with permutation and treatment as factors. **B.** Discrimination index measured in each condition. n.s. non-significant vs. vehicle-injected WT mice, Kruskal-Wallis followed by Dunn's test.

**Supplementary Table S1. Discrimination Indexes and exploration time (in percent) for each behavioral test performed.**

## Supp. Fig. S1

### A. Western blots corresponding to Figure 1A

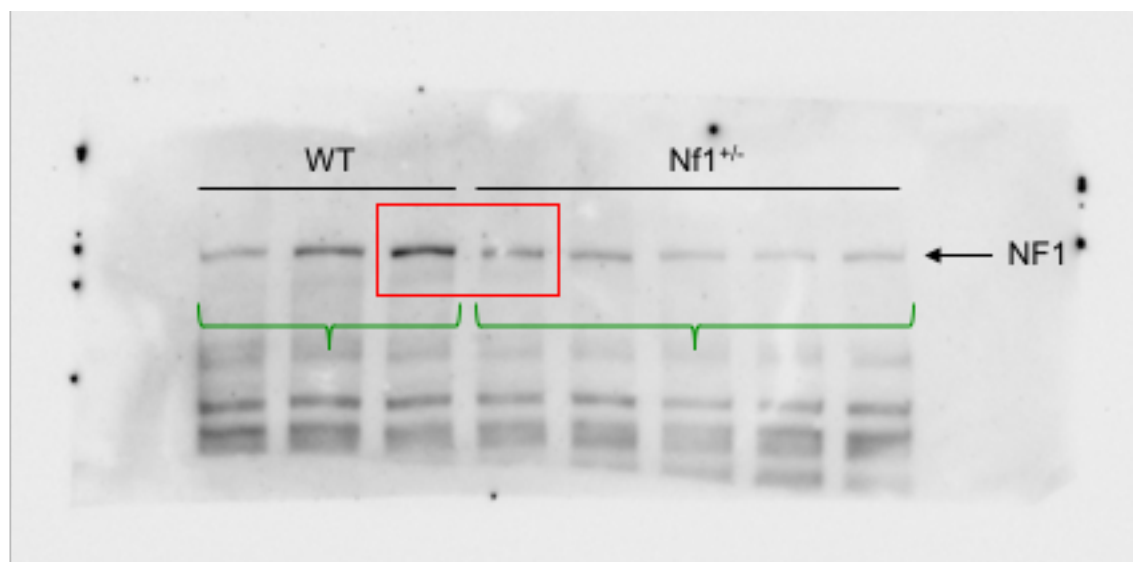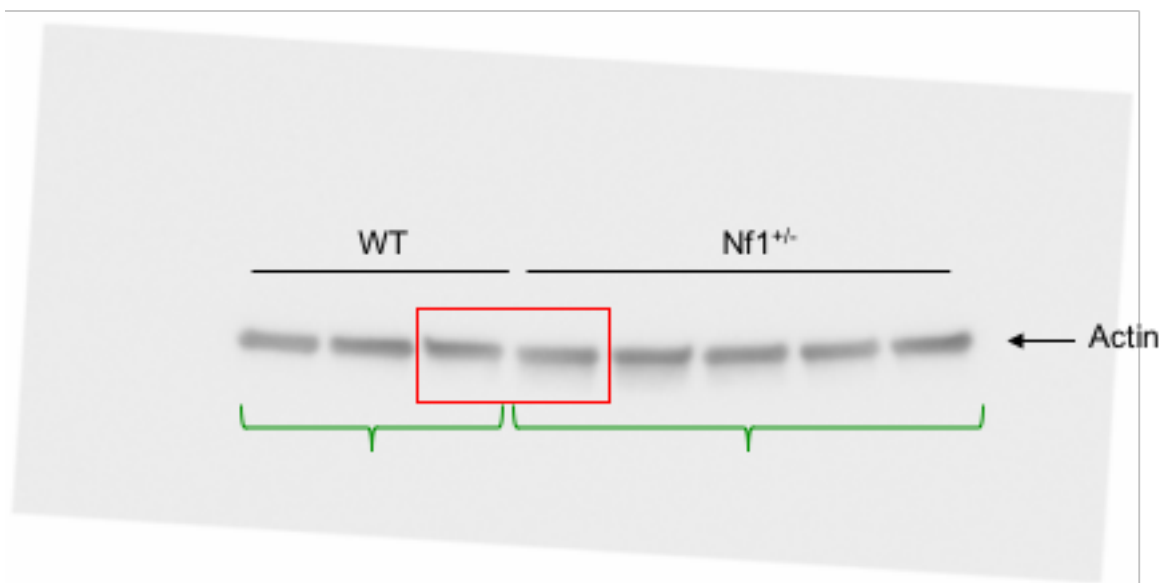

**B. Western blots corresponding to Figure 1B**

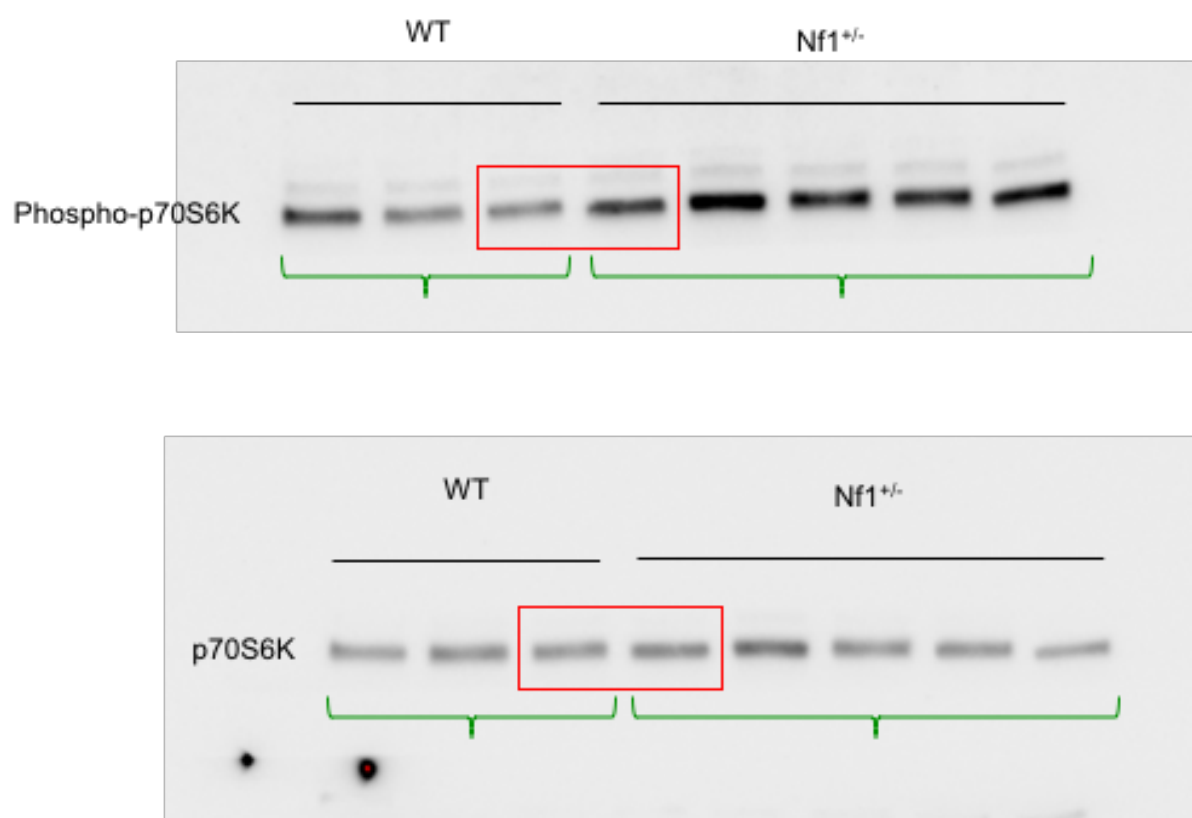

**C. Western blots corresponding to Figure 1C**

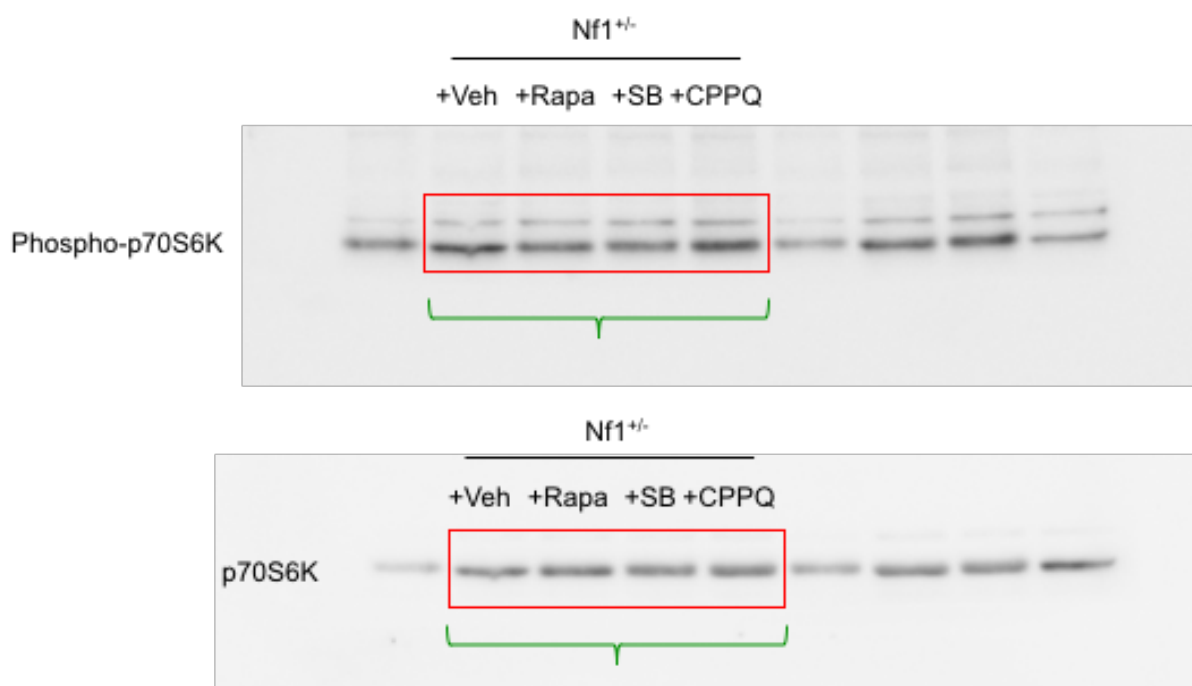

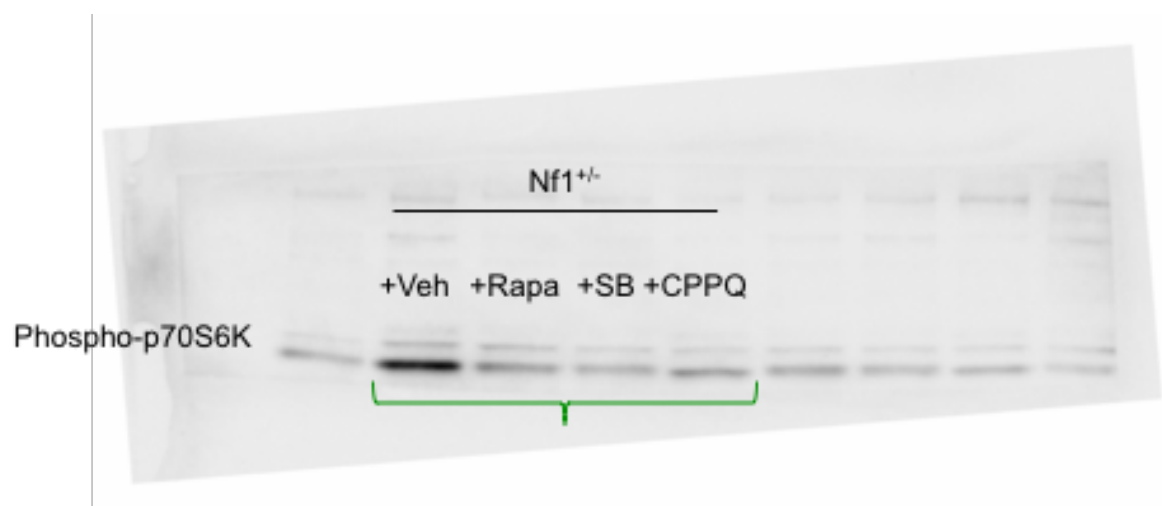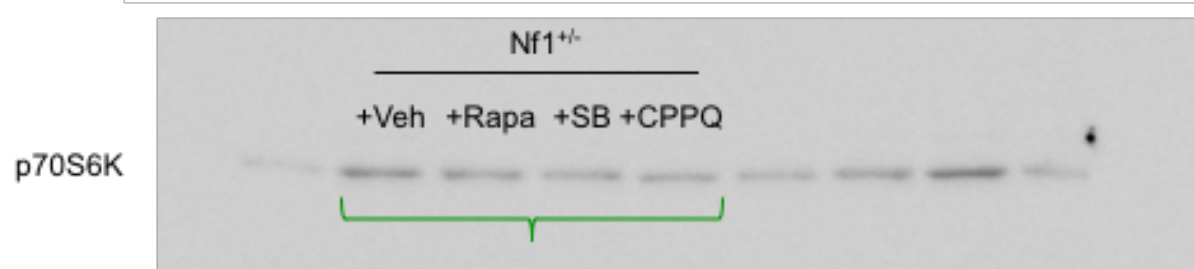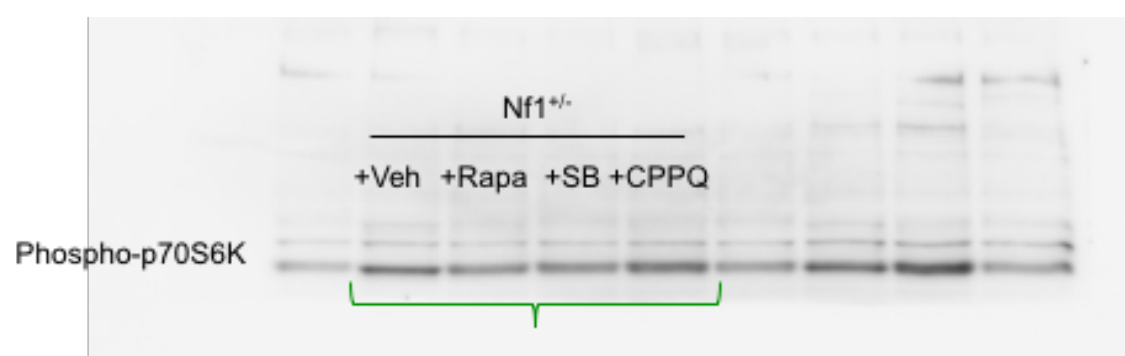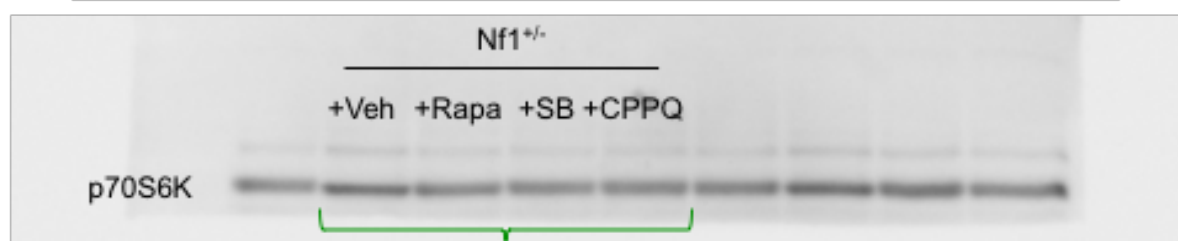

Supp Fig S2

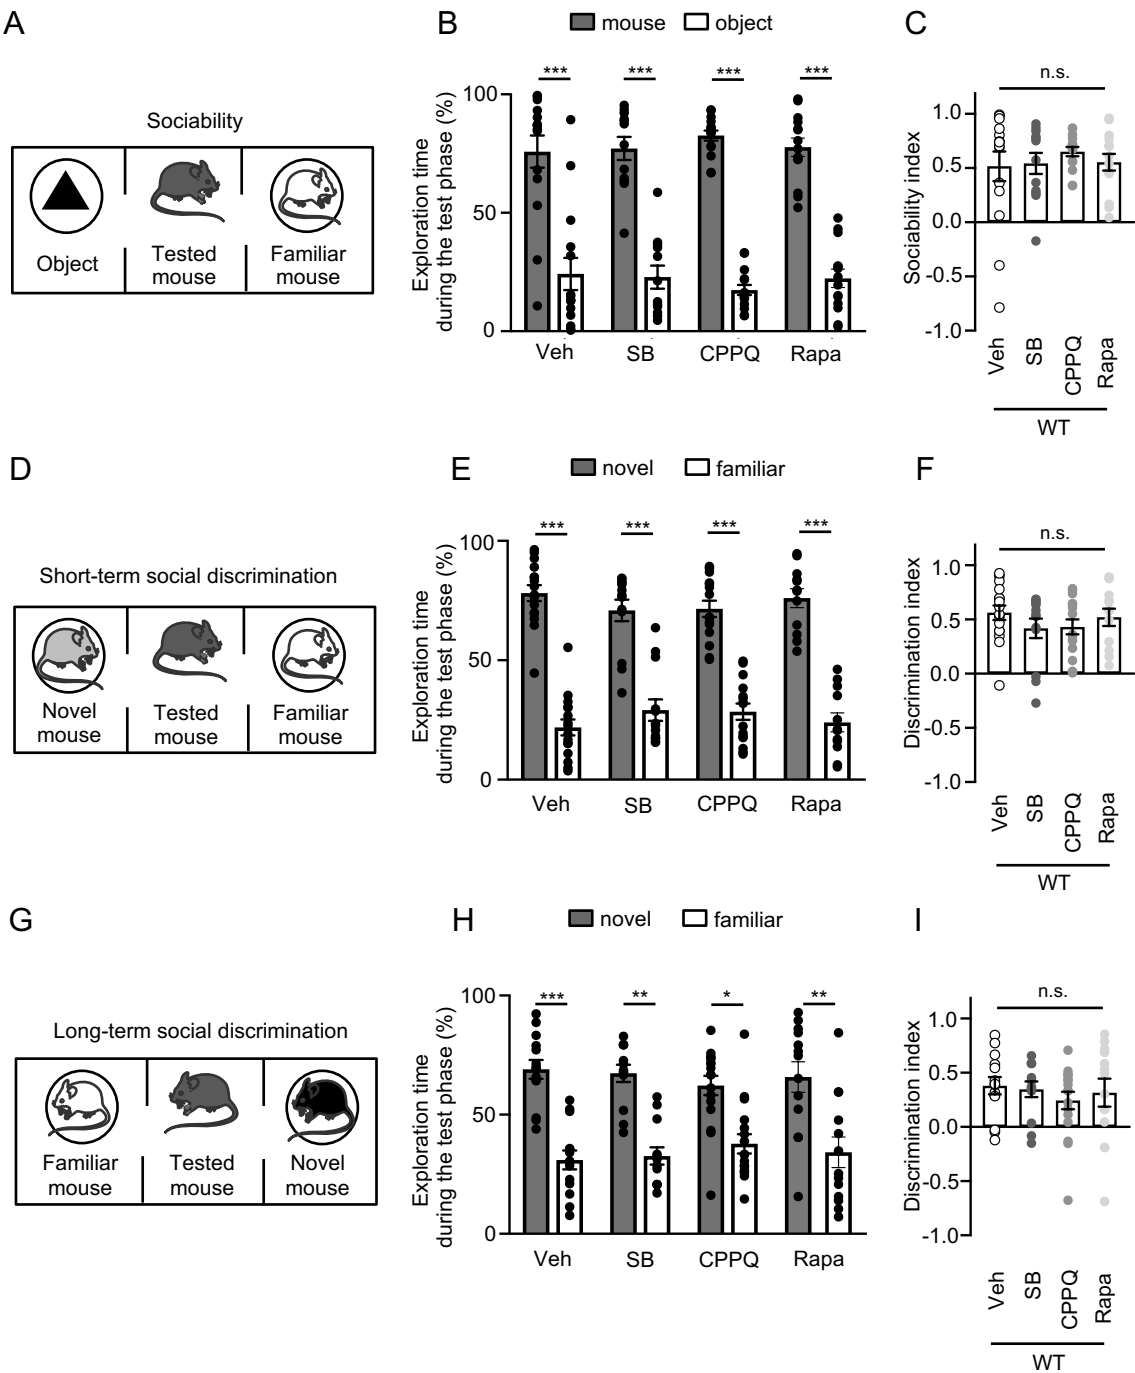

Supp Fig S3

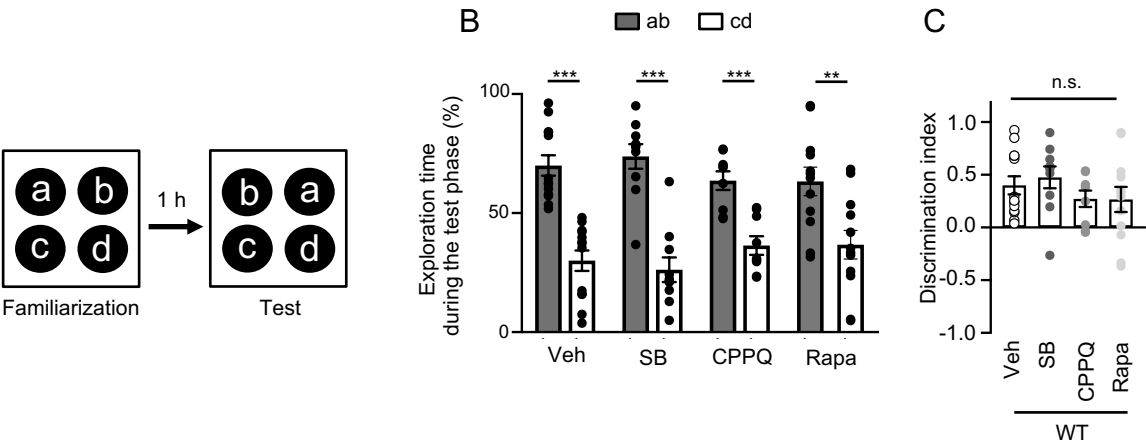

**Supp. Table S1**

| <b>Behavioral test</b> | <b>Experimental conditions</b>      | <b>Discrimination index (mean±sem)</b>  |
|------------------------|-------------------------------------|-----------------------------------------|
| Sociability            | WT + Vehicle                        | 0.52 ± 0.14                             |
|                        | WT + SB258585                       | 0.54 ± 0.10                             |
|                        | WT + CPPQ                           | 0.65 ± 0.04                             |
|                        | WT + Rapamacyn                      | 0.55 ± 0.08                             |
| Short-term memory      | WT + Vehicle                        | 0.56 ± 0.07                             |
|                        | WT + SB258585                       | 0.48 ± 0.09                             |
|                        | WT + CPPQ                           | 0.43 ± 0.07                             |
|                        | WT + Rapamacyn                      | 0.52 ± 0.08                             |
| Long-term memory       | WT + Vehicle                        | 0.38 ± 0.08                             |
|                        | WT + SB258585                       | 0.35 ± 0.07                             |
|                        | WT + CPPQ                           | 0.25 ± 0.08                             |
|                        | WT + Rapamacyn                      | 0.32 ± 0.13                             |
| Object-in-place        | WT + Vehicle                        | 0.40 ± 0.09                             |
|                        | WT + SB258585                       | 0.48 ± 0.10                             |
|                        | WT + CPPQ                           | 0.27 ± 0.08                             |
|                        | WT + Rapamacyn                      | 0.27 ± 0.12                             |
|                        |                                     |                                         |
| <b>Behavioral test</b> | <b>Experimental conditions</b>      | <b>Exploration time in % (mean±sem)</b> |
| Sociability            | WT + Vehicle - novel                | 75.81 ± 6.79                            |
|                        | WT + Vehicle - familiar             | 24.19 ± 6.79                            |
|                        | WT + SB - novel                     | 77.15 ± 4.88                            |
|                        | WT + SB - familiar                  | 22.85 ± 4.88                            |
|                        | WT + CPPQ- novel                    | 82.59 ± 2.14                            |
|                        | WT + CPPQ - familiar                | 17.41 ± 2.14                            |
|                        | WT + Rapa - novel                   | 77.69 ± 3.87                            |
|                        | WT + Rapa - familiar                | 22.31 ± 3.87                            |
| Short-term memory      | WT + Vehicle - novel                | 78.12 ± 3.33                            |
|                        | WT + Vehicle - familiar             | 21.88 ± 3.33                            |
|                        | WT + SB - novel                     | 70.89 ± 4.52                            |
|                        | WT + SB - familiar                  | 29.11 ± 4.52                            |
|                        | WT + CPPQ- novel                    | 71.56 ± 3.47                            |
|                        | WT + CPPQ - familiar                | 28.44 ± 3.47                            |
|                        | WT + Rapa - novel                   | 76.00 ± 3.97                            |
|                        | NF <sup>+/-</sup> + Rapa - familiar | 24.00 ± 3.97                            |
| Long-term memory       | WT + Vehicle - novel                | 69.01 ± 3.96                            |
|                        | WT + Vehicle - familiar             | 30.99 ± 3.96                            |
|                        | WT + SB - novel                     | 67.35 ± 3.61                            |
|                        | WT + SB - familiar                  | 32.65 ± 3.61                            |
|                        | WT + CPPQ- novel                    | 62.24 ± 4.03                            |
|                        | WT + CPPQ - familiar                | 37.76 ± 4.03                            |
|                        | WT + Rapa - novel                   | 65.80 ± 6.44                            |
|                        | WT + Rapa - familiar                | 34.20 ± 6.44                            |



|                 |                       |              |
|-----------------|-----------------------|--------------|
| Object-in-place | WT + Vehicle – « ab » | 69.98 ± 4.31 |
|                 | WT + Vehicle – « cd » | 30.02 ± 4.31 |
|                 | WT + SB - « ab »      | 73.77 ± 5.17 |
|                 | WT + SB - « cd »      | 26.23 ± 5.17 |
|                 | WT + CPPQ- « ab »     | 63.60 ± 3.90 |
|                 | WT + CPPQ - « cd »    | 36.40 ± 3.90 |
|                 | WT + Rapa - « ab »    | 63.29 ± 5.96 |
|                 | WT + Rapa - « cd »    | 36.71 ± 5.96 |
